# Supplementary material
Source: publisher site journal article supplement (https://static.cambridge.org/content/id/urn:cambridge.org:id:article:S1049023X20000850/resource/name/S1049023X20000850supp001.docx)
Supplement: Supplementary file 1 [file S1049023X20000850supp001.docx]

Supplementary Material

Search strategies

**Embase**

| 1 | exp troponin/ |
| --- | --- |
| 2 | Emergency Medical Services.mp. or emergency health service/ |
| 3 | emergency health service/ or paramedical personnel/ or ambulance/ |
| 4 | (Emergency Medical Technicians or paramedic).mp. or paramedical personnel/ |
| 5 | ambulance/ |
| 6 | (prehospital or pre-hospital).mp. |
| 7 | (out of hospital or out-of-hospital).mp. |
| 8 | acute coronary syndrome/ or heart infarction/ |
| 9 | Myocardial Infarction.mp. |
| 10 | Chest Pain.mp. |
| 11 | acute myocardial Infarction.mp. or acute heart infarction/ |
| 12 | 2 or 3 or 4 or 5 or 6 or 7 |
| 13 | 8 or 9 or 10 or 11 |
| 14 | 1 and 12 and 13 |
| 15 | limit 14 to english language |
| 16 | limit 15 to yr="2000 -Current" |
| 17 | limit 16 to full text |

**Ovid MEDLINE**

| 1 | exp Troponin/ |
| --- | --- |
| 2 | Emergency Medical Services/ |
| 3 | paramedic.mp. or Allied Health Personnel/ |
| 4 | Emergency Medical Technicians/ |
| 5 | Ambulances/ |
| 6 | (prehospital or pre-hospital).mp. |
| 7 | (out of hospital or out-of-hospital).mp. |
| 8 | Myocardial Infarction/ or Acute Coronary Syndrome/ |
| 9 | Chest Pain/ |
| 10 | Acute Myocardial Infarction.mp. |
| 11 | 2 or 3 or 4 or 5 or 6 or 7 |
| 12 | 8 or 9 or 10 |
| 13 | 1 and 11 and 12 |
| 14 | limit 13 to (english language and full text) |
| 15 | limit 14 to yr="2000 -Current" |

**CINAHL plus**

| S1 | troponin t OR cTnt OR troponin i OR cTni |
| --- | --- |
| S2 | Emergency Medical Services OR Emergency Medical Technicians OR paramedic* OR pre-hospital OR prehospital OR ambulance* OR out of hospital OR out-of-hospital |
| S3 | acute coronary syndrome OR Myocardial Infarction |
| S4 | S1 AND S2 AND S3 |
